# Supplementary material
Source: Springer Nature journal article supplement (https://www.springermedizin.de/resource/supplementary/13256_2011_1888_MOESM1_ESM.pdf/9648634)

At recurrence

After 1 month of imatinib rechallenge

A

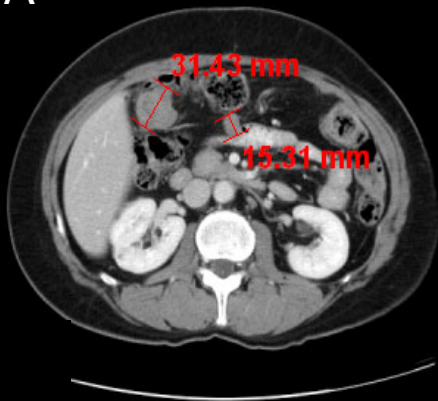

C

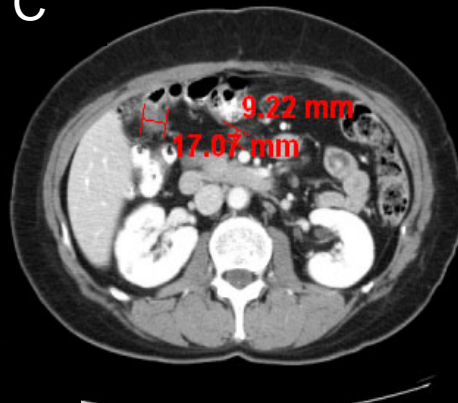

B

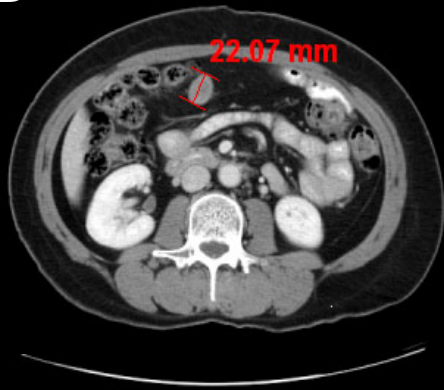

D

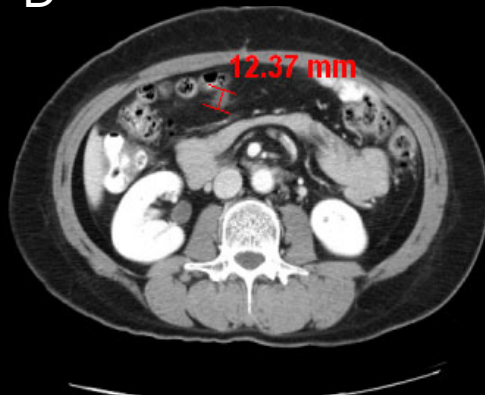

Supplement: MOESM1 [file 9648634]
